# Supplementary material
Source: PubMed Central journal article supplement (PMC5313119)
Supplement: 10.1074_M116.760256_jbc.M116.760256-1.pdf [file 10.1074_M116.760256_jbc.M116.760256-1.pdf]

SUPPLEMENTARY FIGURE  
Zhai et al.

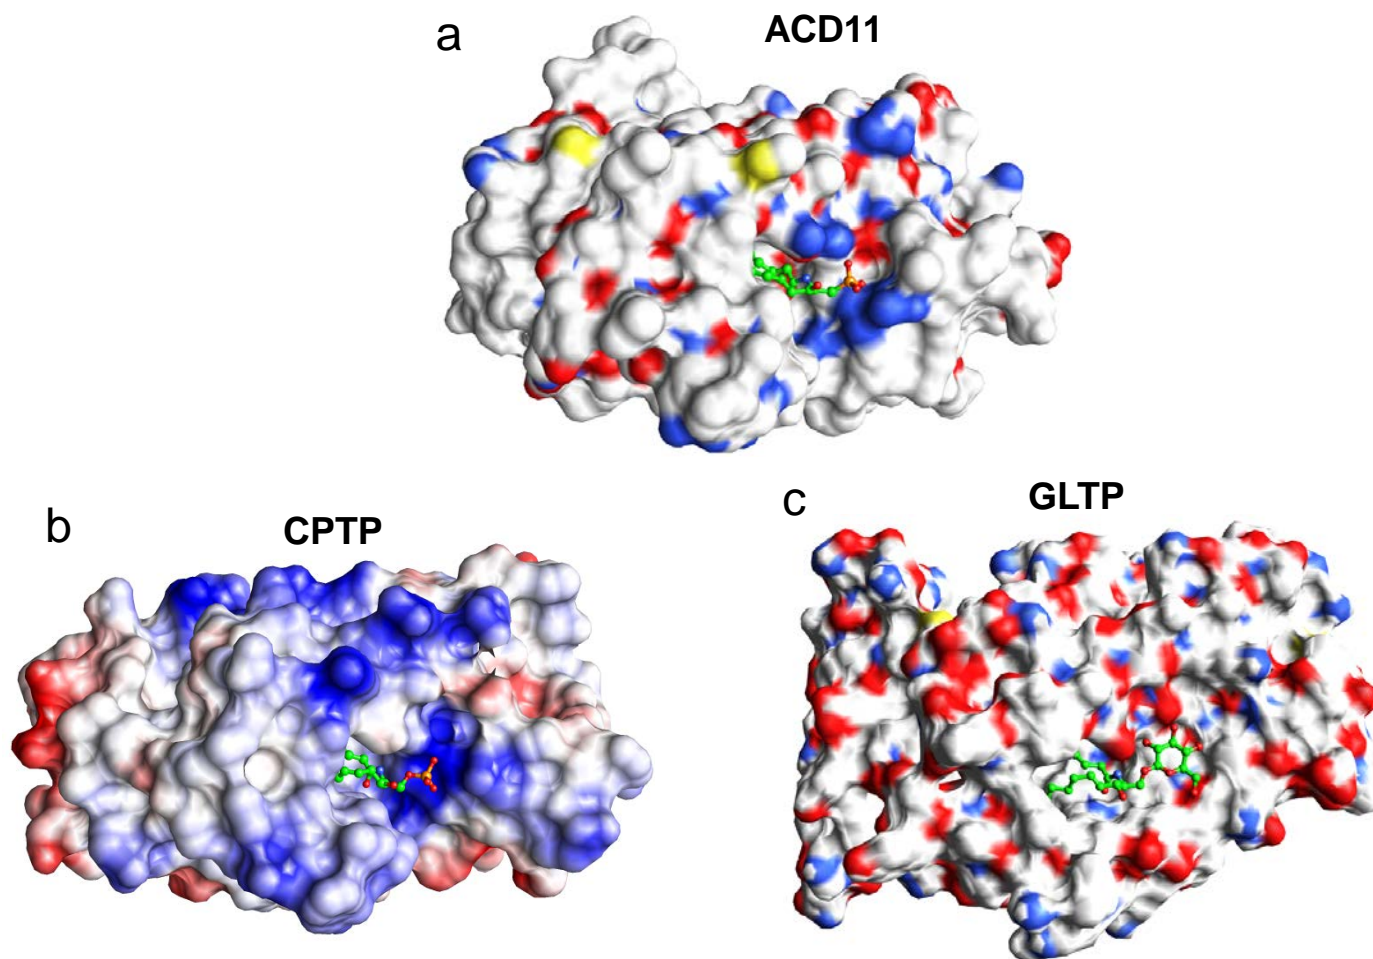

**Supplementary Figure S1:** Surface electrostatics surrounding the sphingolipid binding site in **a)** ACD11, **b)** CPTP, and **c)** GLTP, respectively. (Blue = cationic; red = anionic; and white = neutral residues). Bound sphingolipids are shown in ball-and-stick representation with carbon (green), oxygen (red), nitrogen (blue) and phosphorus (orange). A similar comparison appears in ref. 13.
